# Supplementary material for: BioCode: Two biologically compatible Algorithms for embedding data in non-coding and coding regions of DNA
Source: PubMed Central journal article supplement (PMC3698116; doi:10.1186/1471-2105-14-121), 2013-04-09
Supplement: 1471-2105-14-121-S1.pdf [file 1471-2105-14-121-S1.pdf]

# An Example Embedding using BioCode pcDNA

**Message to Embedded:**

“BioCode preserves codon bias”

**m — Text to Binary (7-bit ASCII) Translation:**

```
10000101101001110111110000111101111110010011001010100000111000011100101100101111001111
0010111100101110110110010111100110100000110001111011111001001101111110111001000001100
010110100111000011110011
```

**$\bar{x}$  — Host Sequence:**

```
ATGTCTTCTAGAAAAAATATTTTGAAGTAATCATCCTAGGTGACTCTGGTGTGGGAAGACCTCCTTGATGCACCGTTATGTCAAT
GATAAGTATTCTCAACAGTATAAAGCAACAATTGGGCTGACTTTTTAACAAAAGAGGTGACAGTTGACGGTGATAAAGTTGCCACCATG
CAAGTTTGGGATACTGCTGGACAGGAACGTTTCCAATCACTGGGTGTTGCTTTCTATAGAGGTGCAGATTGTTGCGTTTTTGGTCTACGAT
GTGACCAATGCCAGTTCCTTTGAGAATATTAAGTCTTGGCGAGATGAATTTCTAGTGCATGCGAACGTAAACTCACAGAAAACATTTCCA
TTTTGTATACTGGGAAATAAAATTGATGCCGAAGAATCTAAAAAATTGATCAGAAAAGTCCGCTCAGGAGCTTGCTAAATCATTAGGC
GATATTCCTTTGTTTTTAAACAAGTGCCAAAAACGCCATAAACGTTGATACCGCATTTGAAGAAATTGCAAGGAGTGCTTTACAACAGAAT
CAAGCTGATACAGAAGCCTTTGAAGATGACTATAATGATGCCATCAATATTCGCCTAGATGGAGAAAATAATTCTTGTAGCTGT
```

**a — Amino Acid Translation of  $\bar{x}$ :**

```
MSSRKNILKVIILGDSGVKTSMLHRYVNDKYSQQYKATIGADFLTKEVTVGDQKVAQTMQVWDTAGQERFQSLGVAFYRGADCCVLVYD
VTNASSFENIKSRDEFVLHANVNSPETFPFVILGNKIDAEESEKIVSEKSAQELAKSLGDIPLFLTSKNAINVDTAFEELIARSALQQN
QADTEAFEDDYNDAINIRLDGENNSCSC
```

**$\bar{y}$  — Encoded Sequence:**

```
ATGTCAAGCAGGAAAAAGAATATACTTAAAGTTATCATTTTGGGGACAGTGGTGTGGCAAGACTTCTCTAATGCATAGATATGTGAAC
GATAAATATTCACAACAATACAAAGCCACCATCGGAGCAGATTTTTAACAAAGGAAGTTACAGTCGACGGTGATAAGGTAGCTACCATG
CAGGTATGGGATACAGCTGGTCAAGAACGCTTTTCAGTCTTGGGAGTTGCAATTTATAGAGGTGCTGACTGCTGTGTTCTGGTATATGAC
GTCACAAATGCCAGTTCCTTTTGAAGAACATTAATCTTGGCGTGATGAGTTTCTGTTGTCACGCAATGTTAACTCTCCTGAGACCTTTCCA
TTCTGTTATTCTAGGAAATAAATAGATGCAGAAGAAAGTAAAAAATCGTTTCCGAAAATCAGCCAGGAACTAGCTAAATCCTTGGGG
GATATTCATTATTTTGAAGTCTGCCAAAAACGCCATTAATGTGGATACAGCCTTTGAAGAAATTGCTCGTCTGCTTTACAACAAAAT
CAGGCTGATACAGAAGCCTTTGAAGATGATTATAATGATGCCATTAATATTCGATTAGATGGTGAATAAATTCTTGTTCATGT
```

**$\hat{m}$  — Decoded Binary**

```
10 00 01 0 1 1 0 10 0 11 10 11 11 10 0 00 11 11 01 1 11 11 00 1 00 1 10 0 1 0 1 01 0 0 0 01 1 10
0 00 1 1 10 0 1 0 11 0 01 0 11 1 1 00 11 1 1 00 1 0 11 11 0 0 10 1 1 10 11 0 11 00 1 0 11 11 0 0 11
01 00 0 0 1 10 00 11 1 1 0 11 11 1 1 0 01 0 0 1 1 0 11 1 1 1 1 0 1 11 0 0 1 0 0 00 0 1 10 0 0 1 0
1 10 1 0 0 1 1 1 0 0 0 0 1 1 1 1 0 0 1 1
```

**Binary to Text Translation:**

“BioCode preserves codon bias”

Figure 1: An example of a BioCode pcDNA encoding. First the message “BioCode preserves codon bias” is translated (including white spaces) into a binary message  $\mathbf{m}$ . Then BioCode embeds  $\mathbf{m}$  in a host sequence  $\bar{x}$  to produce  $\bar{y}$ . The host sequence used in this instance is the ypt7 region ([GenBank:NC\_001145.3 (267174..267800)]), which was also used by Heider et al. in their *in silico* analysis. Each unique colour in the  $\bar{x}$  and  $\bar{y}$  sequences represents the translated amino acid for that codon. The amino acid sequence  $\mathbf{a}$  is translated from  $\bar{x}$ , and is identical to the translation of  $\bar{y}$ .  $\bar{y}$  is decoded to produce  $\hat{m}$ . The coloured bits in  $\hat{m}$  correspond to the codons, and their translated amino acids, which are encoded in  $\bar{y}$ . Then  $\hat{m}$  is translated back into alphanumeric form to give the original message. The Step by Step Embedding Section shows the individual encoding steps used to create  $\bar{y}$ .

# Statistics of Sequences

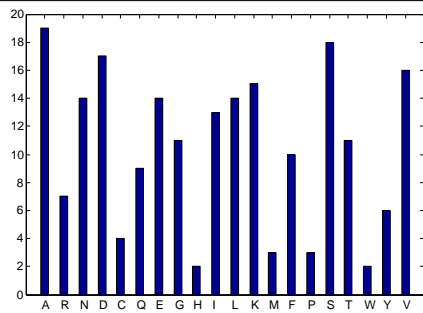

Figure A: Amino Acid count for  $\bar{x}$ .

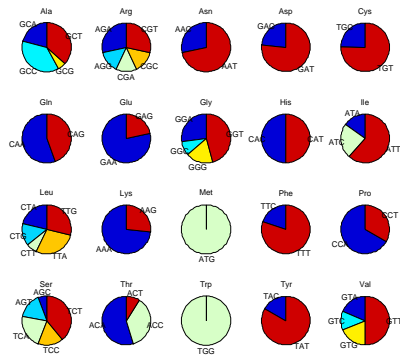

Figure B: Codon bias statistics of  $\bar{x}$ .

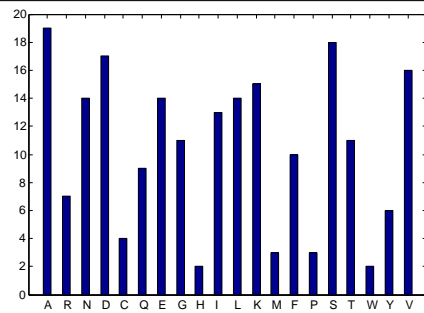

Figure C: Amino Acid count for  $\bar{y}$ .

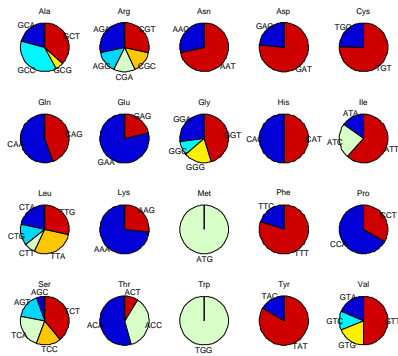

Figure D: Codon bias statistics of  $\bar{y}$ .

Figure 2: Shown in the diagrams above is the statistics for the original host sequence  $\bar{x}$  and the encoded sequence  $\bar{y}$  from Figure 1. The amino acid translation is identical (Figures [A,C]), as it is with all other pcDNA data embedding algorithm. However BioCode pcDNA is the first algorithm to preserve the codon bias, as shown by Figures [B,D].

## Step by Step Embedding

The following is the step by step procedure used to encode the information given in Figure 1. Only the current amino acid encoding table being used for each step is shown. In each of the frames below  $i$  is the current position in  $\mathbf{a}$  (the amino acid sequence) being encoded. Amino acids,  $a_i$ , are represented by single letters given by Matlab's amino acid naming scheme and the full name of the amino acid is given in brackets beside this.

In the example below  $m$  is the current binary message to be embedded using the specified amino acid. When the amino acid  $a_i$  is given as an upper case calligraphic letter it denotes the set of codons which translate that amino acid, if  $a_i = R$ , then its corresponding set of codon which translate R is given by  $\mathcal{R}$ . This set is limited to the codons whose budget for usage has not been exhausted. The codon chosen for embedding is given by  $\hat{y}$ . Once  $\hat{y}$  has been used for embedding the budget for that codon is reduced by one to give  $c_{(\hat{y})}$ . When  $c_{(\hat{y})} = 0$  codon  $\hat{y}$  can no longer be used to encode data and  $\hat{y}$  is removed from the embedding table. Each codon translation set is mapped to a binary set to encode data. The first 80 encoding steps are shown below.

|                                                                                       |
|---------------------------------------------------------------------------------------|
| $i = 1, a_1 = M$<br>(Methionine)<br><b>Cannot Embed</b><br>$m = -$<br>$\hat{y} = ATG$ |
|---------------------------------------------------------------------------------------|

| $i = 2, a_2 = S$ (Serine)                                                                                                                                                                                                                                                                                   |                                                                  |                 |     |    |     |    |     |    |     |     |     |     |                                                                                                                                                                                                                                                                                                             |     |                 |     |    |     |    |     |    |     |     |     |     |
|-------------------------------------------------------------------------------------------------------------------------------------------------------------------------------------------------------------------------------------------------------------------------------------------------------------|------------------------------------------------------------------|-----------------|-----|----|-----|----|-----|----|-----|-----|-----|-----|-------------------------------------------------------------------------------------------------------------------------------------------------------------------------------------------------------------------------------------------------------------------------------------------------------------|-----|-----------------|-----|----|-----|----|-----|----|-----|-----|-----|-----|
| <b>Before Embedding</b><br>$m = 10$                                                                                                                                                                                                                                                                         | <b>After Embedding</b><br>$\hat{y} = TCA$<br>$c_{(\hat{y})} = 3$ |                 |     |    |     |    |     |    |     |     |     |     |                                                                                                                                                                                                                                                                                                             |     |                 |     |    |     |    |     |    |     |     |     |     |
| <table border="1"> <thead> <tr> <th><math>S</math></th> <th><math>\mathcal{M}_S</math></th> </tr> </thead> <tbody> <tr><td>AGC</td><td>00</td></tr> <tr><td>AGT</td><td>01</td></tr> <tr><td>TCA</td><td>10</td></tr> <tr><td>TCC</td><td>110</td></tr> <tr><td>TCT</td><td>111</td></tr> </tbody> </table> | $S$                                                              | $\mathcal{M}_S$ | AGC | 00 | AGT | 01 | TCA | 10 | TCC | 110 | TCT | 111 | <table border="1"> <thead> <tr> <th><math>S</math></th> <th><math>\mathcal{M}_S</math></th> </tr> </thead> <tbody> <tr><td>AGC</td><td>00</td></tr> <tr><td>AGT</td><td>01</td></tr> <tr><td>TCA</td><td>10</td></tr> <tr><td>TCC</td><td>110</td></tr> <tr><td>TCT</td><td>111</td></tr> </tbody> </table> | $S$ | $\mathcal{M}_S$ | AGC | 00 | AGT | 01 | TCA | 10 | TCC | 110 | TCT | 111 |
| $S$                                                                                                                                                                                                                                                                                                         | $\mathcal{M}_S$                                                  |                 |     |    |     |    |     |    |     |     |     |     |                                                                                                                                                                                                                                                                                                             |     |                 |     |    |     |    |     |    |     |     |     |     |
| AGC                                                                                                                                                                                                                                                                                                         | 00                                                               |                 |     |    |     |    |     |    |     |     |     |     |                                                                                                                                                                                                                                                                                                             |     |                 |     |    |     |    |     |    |     |     |     |     |
| AGT                                                                                                                                                                                                                                                                                                         | 01                                                               |                 |     |    |     |    |     |    |     |     |     |     |                                                                                                                                                                                                                                                                                                             |     |                 |     |    |     |    |     |    |     |     |     |     |
| TCA                                                                                                                                                                                                                                                                                                         | 10                                                               |                 |     |    |     |    |     |    |     |     |     |     |                                                                                                                                                                                                                                                                                                             |     |                 |     |    |     |    |     |    |     |     |     |     |
| TCC                                                                                                                                                                                                                                                                                                         | 110                                                              |                 |     |    |     |    |     |    |     |     |     |     |                                                                                                                                                                                                                                                                                                             |     |                 |     |    |     |    |     |    |     |     |     |     |
| TCT                                                                                                                                                                                                                                                                                                         | 111                                                              |                 |     |    |     |    |     |    |     |     |     |     |                                                                                                                                                                                                                                                                                                             |     |                 |     |    |     |    |     |    |     |     |     |     |
| $S$                                                                                                                                                                                                                                                                                                         | $\mathcal{M}_S$                                                  |                 |     |    |     |    |     |    |     |     |     |     |                                                                                                                                                                                                                                                                                                             |     |                 |     |    |     |    |     |    |     |     |     |     |
| AGC                                                                                                                                                                                                                                                                                                         | 00                                                               |                 |     |    |     |    |     |    |     |     |     |     |                                                                                                                                                                                                                                                                                                             |     |                 |     |    |     |    |     |    |     |     |     |     |
| AGT                                                                                                                                                                                                                                                                                                         | 01                                                               |                 |     |    |     |    |     |    |     |     |     |     |                                                                                                                                                                                                                                                                                                             |     |                 |     |    |     |    |     |    |     |     |     |     |
| TCA                                                                                                                                                                                                                                                                                                         | 10                                                               |                 |     |    |     |    |     |    |     |     |     |     |                                                                                                                                                                                                                                                                                                             |     |                 |     |    |     |    |     |    |     |     |     |     |
| TCC                                                                                                                                                                                                                                                                                                         | 110                                                              |                 |     |    |     |    |     |    |     |     |     |     |                                                                                                                                                                                                                                                                                                             |     |                 |     |    |     |    |     |    |     |     |     |     |
| TCT                                                                                                                                                                                                                                                                                                         | 111                                                              |                 |     |    |     |    |     |    |     |     |     |     |                                                                                                                                                                                                                                                                                                             |     |                 |     |    |     |    |     |    |     |     |     |     |

| $i = 3, a_3 = S$ (Serine)                                                                                                                                                                                                                                                                                   |                                                                  |                 |     |    |     |    |     |    |     |     |     |     |                                                                                                                                                                                                                                                                          |     |                 |     |    |     |    |     |    |     |    |
|-------------------------------------------------------------------------------------------------------------------------------------------------------------------------------------------------------------------------------------------------------------------------------------------------------------|------------------------------------------------------------------|-----------------|-----|----|-----|----|-----|----|-----|-----|-----|-----|--------------------------------------------------------------------------------------------------------------------------------------------------------------------------------------------------------------------------------------------------------------------------|-----|-----------------|-----|----|-----|----|-----|----|-----|----|
| <b>Before Embedding</b><br>$m = 00$                                                                                                                                                                                                                                                                         | <b>After Embedding</b><br>$\hat{y} = AGC$<br>$c_{(\hat{y})} = 0$ |                 |     |    |     |    |     |    |     |     |     |     |                                                                                                                                                                                                                                                                          |     |                 |     |    |     |    |     |    |     |    |
| <table border="1"> <thead> <tr> <th><math>S</math></th> <th><math>\mathcal{M}_S</math></th> </tr> </thead> <tbody> <tr><td>AGC</td><td>00</td></tr> <tr><td>AGT</td><td>01</td></tr> <tr><td>TCA</td><td>10</td></tr> <tr><td>TCC</td><td>110</td></tr> <tr><td>TCT</td><td>111</td></tr> </tbody> </table> | $S$                                                              | $\mathcal{M}_S$ | AGC | 00 | AGT | 01 | TCA | 10 | TCC | 110 | TCT | 111 | <table border="1"> <thead> <tr> <th><math>S</math></th> <th><math>\mathcal{M}_S</math></th> </tr> </thead> <tbody> <tr><td>AGT</td><td>00</td></tr> <tr><td>TCA</td><td>01</td></tr> <tr><td>TCC</td><td>10</td></tr> <tr><td>TCT</td><td>11</td></tr> </tbody> </table> | $S$ | $\mathcal{M}_S$ | AGT | 00 | TCA | 01 | TCC | 10 | TCT | 11 |
| $S$                                                                                                                                                                                                                                                                                                         | $\mathcal{M}_S$                                                  |                 |     |    |     |    |     |    |     |     |     |     |                                                                                                                                                                                                                                                                          |     |                 |     |    |     |    |     |    |     |    |
| AGC                                                                                                                                                                                                                                                                                                         | 00                                                               |                 |     |    |     |    |     |    |     |     |     |     |                                                                                                                                                                                                                                                                          |     |                 |     |    |     |    |     |    |     |    |
| AGT                                                                                                                                                                                                                                                                                                         | 01                                                               |                 |     |    |     |    |     |    |     |     |     |     |                                                                                                                                                                                                                                                                          |     |                 |     |    |     |    |     |    |     |    |
| TCA                                                                                                                                                                                                                                                                                                         | 10                                                               |                 |     |    |     |    |     |    |     |     |     |     |                                                                                                                                                                                                                                                                          |     |                 |     |    |     |    |     |    |     |    |
| TCC                                                                                                                                                                                                                                                                                                         | 110                                                              |                 |     |    |     |    |     |    |     |     |     |     |                                                                                                                                                                                                                                                                          |     |                 |     |    |     |    |     |    |     |    |
| TCT                                                                                                                                                                                                                                                                                                         | 111                                                              |                 |     |    |     |    |     |    |     |     |     |     |                                                                                                                                                                                                                                                                          |     |                 |     |    |     |    |     |    |     |    |
| $S$                                                                                                                                                                                                                                                                                                         | $\mathcal{M}_S$                                                  |                 |     |    |     |    |     |    |     |     |     |     |                                                                                                                                                                                                                                                                          |     |                 |     |    |     |    |     |    |     |    |
| AGT                                                                                                                                                                                                                                                                                                         | 00                                                               |                 |     |    |     |    |     |    |     |     |     |     |                                                                                                                                                                                                                                                                          |     |                 |     |    |     |    |     |    |     |    |
| TCA                                                                                                                                                                                                                                                                                                         | 01                                                               |                 |     |    |     |    |     |    |     |     |     |     |                                                                                                                                                                                                                                                                          |     |                 |     |    |     |    |     |    |     |    |
| TCC                                                                                                                                                                                                                                                                                                         | 10                                                               |                 |     |    |     |    |     |    |     |     |     |     |                                                                                                                                                                                                                                                                          |     |                 |     |    |     |    |     |    |     |    |
| TCT                                                                                                                                                                                                                                                                                                         | 11                                                               |                 |     |    |     |    |     |    |     |     |     |     |                                                                                                                                                                                                                                                                          |     |                 |     |    |     |    |     |    |     |    |

| $i = 4, a_4 = R$ (Arginine)                                                                                                                                                                                                                                                                                           |                                                                  |                 |     |    |     |    |     |    |     |     |     |     |                                                                                                                                                                                                                                                                                    |               |                 |     |    |     |    |     |    |     |    |
|-----------------------------------------------------------------------------------------------------------------------------------------------------------------------------------------------------------------------------------------------------------------------------------------------------------------------|------------------------------------------------------------------|-----------------|-----|----|-----|----|-----|----|-----|-----|-----|-----|------------------------------------------------------------------------------------------------------------------------------------------------------------------------------------------------------------------------------------------------------------------------------------|---------------|-----------------|-----|----|-----|----|-----|----|-----|----|
| <b>Before Embedding</b><br>$m = 01$                                                                                                                                                                                                                                                                                   | <b>After Embedding</b><br>$\hat{y} = AGG$<br>$c_{(\hat{y})} = 0$ |                 |     |    |     |    |     |    |     |     |     |     |                                                                                                                                                                                                                                                                                    |               |                 |     |    |     |    |     |    |     |    |
| <table border="1"> <thead> <tr> <th><math>\mathcal{R}</math></th> <th><math>\mathcal{M}_R</math></th> </tr> </thead> <tbody> <tr><td>AGA</td><td>00</td></tr> <tr><td>AGG</td><td>01</td></tr> <tr><td>CGA</td><td>10</td></tr> <tr><td>CGC</td><td>110</td></tr> <tr><td>CGT</td><td>111</td></tr> </tbody> </table> | $\mathcal{R}$                                                    | $\mathcal{M}_R$ | AGA | 00 | AGG | 01 | CGA | 10 | CGC | 110 | CGT | 111 | <table border="1"> <thead> <tr> <th><math>\mathcal{R}</math></th> <th><math>\mathcal{M}_R</math></th> </tr> </thead> <tbody> <tr><td>AGA</td><td>00</td></tr> <tr><td>CGA</td><td>01</td></tr> <tr><td>CGC</td><td>10</td></tr> <tr><td>CGT</td><td>11</td></tr> </tbody> </table> | $\mathcal{R}$ | $\mathcal{M}_R$ | AGA | 00 | CGA | 01 | CGC | 10 | CGT | 11 |
| $\mathcal{R}$                                                                                                                                                                                                                                                                                                         | $\mathcal{M}_R$                                                  |                 |     |    |     |    |     |    |     |     |     |     |                                                                                                                                                                                                                                                                                    |               |                 |     |    |     |    |     |    |     |    |
| AGA                                                                                                                                                                                                                                                                                                                   | 00                                                               |                 |     |    |     |    |     |    |     |     |     |     |                                                                                                                                                                                                                                                                                    |               |                 |     |    |     |    |     |    |     |    |
| AGG                                                                                                                                                                                                                                                                                                                   | 01                                                               |                 |     |    |     |    |     |    |     |     |     |     |                                                                                                                                                                                                                                                                                    |               |                 |     |    |     |    |     |    |     |    |
| CGA                                                                                                                                                                                                                                                                                                                   | 10                                                               |                 |     |    |     |    |     |    |     |     |     |     |                                                                                                                                                                                                                                                                                    |               |                 |     |    |     |    |     |    |     |    |
| CGC                                                                                                                                                                                                                                                                                                                   | 110                                                              |                 |     |    |     |    |     |    |     |     |     |     |                                                                                                                                                                                                                                                                                    |               |                 |     |    |     |    |     |    |     |    |
| CGT                                                                                                                                                                                                                                                                                                                   | 111                                                              |                 |     |    |     |    |     |    |     |     |     |     |                                                                                                                                                                                                                                                                                    |               |                 |     |    |     |    |     |    |     |    |
| $\mathcal{R}$                                                                                                                                                                                                                                                                                                         | $\mathcal{M}_R$                                                  |                 |     |    |     |    |     |    |     |     |     |     |                                                                                                                                                                                                                                                                                    |               |                 |     |    |     |    |     |    |     |    |
| AGA                                                                                                                                                                                                                                                                                                                   | 00                                                               |                 |     |    |     |    |     |    |     |     |     |     |                                                                                                                                                                                                                                                                                    |               |                 |     |    |     |    |     |    |     |    |
| CGA                                                                                                                                                                                                                                                                                                                   | 01                                                               |                 |     |    |     |    |     |    |     |     |     |     |                                                                                                                                                                                                                                                                                    |               |                 |     |    |     |    |     |    |     |    |
| CGC                                                                                                                                                                                                                                                                                                                   | 10                                                               |                 |     |    |     |    |     |    |     |     |     |     |                                                                                                                                                                                                                                                                                    |               |                 |     |    |     |    |     |    |     |    |
| CGT                                                                                                                                                                                                                                                                                                                   | 11                                                               |                 |     |    |     |    |     |    |     |     |     |     |                                                                                                                                                                                                                                                                                    |               |                 |     |    |     |    |     |    |     |    |

| $i = 5, a_5 = K$ (Lysine)                                                                                                                                                                                      |                                                                   |                 |     |   |     |   |                                                                                                                                                                                                                |               |                 |     |   |     |   |
|----------------------------------------------------------------------------------------------------------------------------------------------------------------------------------------------------------------|-------------------------------------------------------------------|-----------------|-----|---|-----|---|----------------------------------------------------------------------------------------------------------------------------------------------------------------------------------------------------------------|---------------|-----------------|-----|---|-----|---|
| <b>Before Embedding</b><br>$m = 0$                                                                                                                                                                             | <b>After Embedding</b><br>$\hat{y} = AAA$<br>$c_{(\hat{y})} = 10$ |                 |     |   |     |   |                                                                                                                                                                                                                |               |                 |     |   |     |   |
| <table border="1"> <thead> <tr> <th><math>\mathcal{K}</math></th> <th><math>\mathcal{M}_K</math></th> </tr> </thead> <tbody> <tr><td>AAA</td><td>0</td></tr> <tr><td>AAG</td><td>1</td></tr> </tbody> </table> | $\mathcal{K}$                                                     | $\mathcal{M}_K$ | AAA | 0 | AAG | 1 | <table border="1"> <thead> <tr> <th><math>\mathcal{K}</math></th> <th><math>\mathcal{M}_K</math></th> </tr> </thead> <tbody> <tr><td>AAA</td><td>0</td></tr> <tr><td>AAG</td><td>1</td></tr> </tbody> </table> | $\mathcal{K}$ | $\mathcal{M}_K$ | AAA | 0 | AAG | 1 |
| $\mathcal{K}$                                                                                                                                                                                                  | $\mathcal{M}_K$                                                   |                 |     |   |     |   |                                                                                                                                                                                                                |               |                 |     |   |     |   |
| AAA                                                                                                                                                                                                            | 0                                                                 |                 |     |   |     |   |                                                                                                                                                                                                                |               |                 |     |   |     |   |
| AAG                                                                                                                                                                                                            | 1                                                                 |                 |     |   |     |   |                                                                                                                                                                                                                |               |                 |     |   |     |   |
| $\mathcal{K}$                                                                                                                                                                                                  | $\mathcal{M}_K$                                                   |                 |     |   |     |   |                                                                                                                                                                                                                |               |                 |     |   |     |   |
| AAA                                                                                                                                                                                                            | 0                                                                 |                 |     |   |     |   |                                                                                                                                                                                                                |               |                 |     |   |     |   |
| AAG                                                                                                                                                                                                            | 1                                                                 |                 |     |   |     |   |                                                                                                                                                                                                                |               |                 |     |   |     |   |

| $i = 6, a_6 = K$ (Lysine)                                                                                                                                                                                      |                                                                  |                 |     |   |     |   |                                                                                                                                                                                                                |               |                 |     |   |     |   |
|----------------------------------------------------------------------------------------------------------------------------------------------------------------------------------------------------------------|------------------------------------------------------------------|-----------------|-----|---|-----|---|----------------------------------------------------------------------------------------------------------------------------------------------------------------------------------------------------------------|---------------|-----------------|-----|---|-----|---|
| <b>Before Embedding</b><br>$m = 1$                                                                                                                                                                             | <b>After Embedding</b><br>$\hat{y} = AAG$<br>$c_{(\hat{y})} = 3$ |                 |     |   |     |   |                                                                                                                                                                                                                |               |                 |     |   |     |   |
| <table border="1"> <thead> <tr> <th><math>\mathcal{K}</math></th> <th><math>\mathcal{M}_K</math></th> </tr> </thead> <tbody> <tr><td>AAA</td><td>0</td></tr> <tr><td>AAG</td><td>1</td></tr> </tbody> </table> | $\mathcal{K}$                                                    | $\mathcal{M}_K$ | AAA | 0 | AAG | 1 | <table border="1"> <thead> <tr> <th><math>\mathcal{K}</math></th> <th><math>\mathcal{M}_K</math></th> </tr> </thead> <tbody> <tr><td>AAA</td><td>0</td></tr> <tr><td>AAG</td><td>1</td></tr> </tbody> </table> | $\mathcal{K}$ | $\mathcal{M}_K$ | AAA | 0 | AAG | 1 |
| $\mathcal{K}$                                                                                                                                                                                                  | $\mathcal{M}_K$                                                  |                 |     |   |     |   |                                                                                                                                                                                                                |               |                 |     |   |     |   |
| AAA                                                                                                                                                                                                            | 0                                                                |                 |     |   |     |   |                                                                                                                                                                                                                |               |                 |     |   |     |   |
| AAG                                                                                                                                                                                                            | 1                                                                |                 |     |   |     |   |                                                                                                                                                                                                                |               |                 |     |   |     |   |
| $\mathcal{K}$                                                                                                                                                                                                  | $\mathcal{M}_K$                                                  |                 |     |   |     |   |                                                                                                                                                                                                                |               |                 |     |   |     |   |
| AAA                                                                                                                                                                                                            | 0                                                                |                 |     |   |     |   |                                                                                                                                                                                                                |               |                 |     |   |     |   |
| AAG                                                                                                                                                                                                            | 1                                                                |                 |     |   |     |   |                                                                                                                                                                                                                |               |                 |     |   |     |   |

$i = 7, a_7 = \text{N}$  (Asparagine)

| Before Embedding |                             | After Embedding                               |                             |
|------------------|-----------------------------|-----------------------------------------------|-----------------------------|
| $m = 1$          |                             | $\hat{y} = \text{AAT}$<br>$c_{(\hat{y})} = 9$ |                             |
| $\mathcal{N}$    | $\mathcal{M}_{\mathcal{N}}$ | $\mathcal{N}$                                 | $\mathcal{M}_{\mathcal{N}}$ |
| AAC              | 0                           | AAC                                           | 0                           |
| AAT              | 1                           | AAT                                           | 1                           |

$i = 8, a_8 = \text{I}$  (Isoleucine)

| Before Embedding |                             | After Embedding                               |                             |
|------------------|-----------------------------|-----------------------------------------------|-----------------------------|
| $m = 0$          |                             | $\hat{y} = \text{ATA}$<br>$c_{(\hat{y})} = 1$ |                             |
| $\mathcal{I}$    | $\mathcal{M}_{\mathcal{I}}$ | $\mathcal{I}$                                 | $\mathcal{M}_{\mathcal{I}}$ |
| ATA              | 0                           | ATA                                           | 0                           |
| ATC              | 10                          | ATC                                           | 10                          |
| ATT              | 11                          | ATT                                           | 11                          |

$i = 9, a_9 = \text{L}$  (Leucine)

| Before Embedding |                             | After Embedding                               |                             |
|------------------|-----------------------------|-----------------------------------------------|-----------------------------|
| $m = 10$         |                             | $\hat{y} = \text{CTT}$<br>$c_{(\hat{y})} = 0$ |                             |
| $\mathcal{L}$    | $\mathcal{M}_{\mathcal{L}}$ | $\mathcal{L}$                                 | $\mathcal{M}_{\mathcal{L}}$ |
| CTA              | 00                          | CTA                                           | 00                          |
| CTG              | 01                          | CTG                                           | 01                          |
| CTT              | 10                          | CTT                                           | 10                          |
| TTA              | 110                         | TTA                                           | 10                          |
| TTG              | 111                         | TTG                                           | 11                          |

$i = 10, a_{10} = \text{K}$  (Lysine)

| Before Embedding |                             | After Embedding                               |                             |
|------------------|-----------------------------|-----------------------------------------------|-----------------------------|
| $m = 0$          |                             | $\hat{y} = \text{AAA}$<br>$c_{(\hat{y})} = 9$ |                             |
| $\mathcal{K}$    | $\mathcal{M}_{\mathcal{K}}$ | $\mathcal{K}$                                 | $\mathcal{M}_{\mathcal{K}}$ |
| AAA              | 0                           | AAA                                           | 0                           |
| AAG              | 1                           | AAG                                           | 1                           |

$i = 11, a_{11} = \text{V}$  (Valine)

| Before Embedding |                             | After Embedding                               |                             |
|------------------|-----------------------------|-----------------------------------------------|-----------------------------|
| $m = 11$         |                             | $\hat{y} = \text{GTT}$<br>$c_{(\hat{y})} = 7$ |                             |
| $\mathcal{V}$    | $\mathcal{M}_{\mathcal{V}}$ | $\mathcal{V}$                                 | $\mathcal{M}_{\mathcal{V}}$ |
| GTA              | 00                          | GTA                                           | 00                          |
| GTC              | 01                          | GTC                                           | 01                          |
| GTG              | 10                          | GTG                                           | 10                          |
| GTT              | 11                          | GTT                                           | 11                          |

$i = 12, a_{12} = \text{I}$  (Isoleucine)

| Before Embedding |                             | After Embedding                               |                             |
|------------------|-----------------------------|-----------------------------------------------|-----------------------------|
| $m = 10$         |                             | $\hat{y} = \text{ATC}$<br>$c_{(\hat{y})} = 2$ |                             |
| $\mathcal{I}$    | $\mathcal{M}_{\mathcal{I}}$ | $\mathcal{I}$                                 | $\mathcal{M}_{\mathcal{I}}$ |
| ATA              | 0                           | ATA                                           | 0                           |
| ATC              | 10                          | ATC                                           | 10                          |
| ATT              | 11                          | ATT                                           | 11                          |

$i = 13, a_{13} = \text{I}$  (Isoleucine)

| Before Embedding |                             | After Embedding                               |                             |
|------------------|-----------------------------|-----------------------------------------------|-----------------------------|
| $m = 11$         |                             | $\hat{y} = \text{ATT}$<br>$c_{(\hat{y})} = 7$ |                             |
| $\mathcal{I}$    | $\mathcal{M}_{\mathcal{I}}$ | $\mathcal{I}$                                 | $\mathcal{M}_{\mathcal{I}}$ |
| ATA              | 0                           | ATA                                           | 0                           |
| ATC              | 10                          | ATC                                           | 10                          |
| ATT              | 11                          | ATT                                           | 11                          |

$i = 14, a_{14} = \text{L}$  (Leucine)

| Before Embedding |                             | After Embedding                               |                             |
|------------------|-----------------------------|-----------------------------------------------|-----------------------------|
| $m = 11$         |                             | $\hat{y} = \text{TTC}$<br>$c_{(\hat{y})} = 3$ |                             |
| $\mathcal{L}$    | $\mathcal{M}_{\mathcal{L}}$ | $\mathcal{L}$                                 | $\mathcal{M}_{\mathcal{L}}$ |
| CTA              | 00                          | CTA                                           | 00                          |
| CTG              | 01                          | CTG                                           | 01                          |
| TTA              | 10                          | TTA                                           | 10                          |
| TTG              | 11                          | TTG                                           | 11                          |

$i = 15, a_{15} = \text{G (Glycine)}$

| Before Embedding |                             | After Embedding                               |                             |
|------------------|-----------------------------|-----------------------------------------------|-----------------------------|
| $m = 10$         |                             | $\hat{y} = \text{GGG}$<br>$c_{(\hat{y})} = 1$ |                             |
| $\mathcal{G}$    | $\mathcal{M}_{\mathcal{G}}$ | $\mathcal{G}$                                 | $\mathcal{M}_{\mathcal{G}}$ |
| GGA              | 00                          | GGA                                           | 00                          |
| GGC              | 01                          | GGC                                           | 01                          |
| GGG              | 10                          | GGG                                           | 10                          |
| GGT              | 11                          | GGT                                           | 11                          |

$i = 16, a_{16} = \text{D (Aspartic acid)}$

| Before Embedding |                             | After Embedding                               |                             |
|------------------|-----------------------------|-----------------------------------------------|-----------------------------|
| $m = 0$          |                             | $\hat{y} = \text{GAC}$<br>$c_{(\hat{y})} = 3$ |                             |
| $\mathcal{D}$    | $\mathcal{M}_{\mathcal{D}}$ | $\mathcal{D}$                                 | $\mathcal{M}_{\mathcal{D}}$ |
| GAC              | 0                           | GAC                                           | 0                           |
| GAT              | 1                           | GAT                                           | 1                           |

$i = 17, a_{17} = \text{S (Serine)}$

| Before Embedding |                             | After Embedding                               |                             |
|------------------|-----------------------------|-----------------------------------------------|-----------------------------|
| $m = 00$         |                             | $\hat{y} = \text{AGT}$<br>$c_{(\hat{y})} = 2$ |                             |
| $\mathcal{S}$    | $\mathcal{M}_{\mathcal{S}}$ | $\mathcal{S}$                                 | $\mathcal{M}_{\mathcal{S}}$ |
| AGT              | 00                          | AGT                                           | 00                          |
| TCA              | 01                          | TCA                                           | 01                          |
| TCC              | 10                          | TCC                                           | 10                          |
| TCT              | 11                          | TCT                                           | 11                          |

$i = 18, a_{18} = \text{G (Glycine)}$

| Before Embedding |                             | After Embedding                               |                             |
|------------------|-----------------------------|-----------------------------------------------|-----------------------------|
| $m = 11$         |                             | $\hat{y} = \text{GGT}$<br>$c_{(\hat{y})} = 4$ |                             |
| $\mathcal{G}$    | $\mathcal{M}_{\mathcal{G}}$ | $\mathcal{G}$                                 | $\mathcal{M}_{\mathcal{G}}$ |
| GGA              | 00                          | GGA                                           | 00                          |
| GGC              | 01                          | GGC                                           | 01                          |
| GGG              | 10                          | GGG                                           | 10                          |
| GGT              | 11                          | GGT                                           | 11                          |

$i = 19, a_{19} = \text{V (Valine)}$

| Before Embedding |                             | After Embedding                               |                             |
|------------------|-----------------------------|-----------------------------------------------|-----------------------------|
| $m = 11$         |                             | $\hat{y} = \text{GTT}$<br>$c_{(\hat{y})} = 6$ |                             |
| $\mathcal{V}$    | $\mathcal{M}_{\mathcal{V}}$ | $\mathcal{V}$                                 | $\mathcal{M}_{\mathcal{V}}$ |
| GTA              | 00                          | GTA                                           | 00                          |
| GTC              | 01                          | GTC                                           | 01                          |
| GTG              | 10                          | GTG                                           | 10                          |
| GTT              | 11                          | GTT                                           | 11                          |

$i = 20, a_{20} = \text{G (Glycine)}$

| Before Embedding |                             | After Embedding                               |                             |
|------------------|-----------------------------|-----------------------------------------------|-----------------------------|
| $m = 01$         |                             | $\hat{y} = \text{GGC}$<br>$c_{(\hat{y})} = 0$ |                             |
| $\mathcal{G}$    | $\mathcal{M}_{\mathcal{G}}$ | $\mathcal{G}$                                 | $\mathcal{M}_{\mathcal{G}}$ |
| GGA              | 00                          | GGA                                           | 0                           |
| GGC              | 01                          | GGC                                           | 10                          |
| GGG              | 10                          | GGT                                           | 11                          |
| GGT              | 11                          |                                               |                             |

$i = 21, a_{21} = \text{K (Lysine)}$

| Before Embedding |                             | After Embedding                               |                             |
|------------------|-----------------------------|-----------------------------------------------|-----------------------------|
| $m = 1$          |                             | $\hat{y} = \text{AAG}$<br>$c_{(\hat{y})} = 2$ |                             |
| $\mathcal{K}$    | $\mathcal{M}_{\mathcal{K}}$ | $\mathcal{K}$                                 | $\mathcal{M}_{\mathcal{K}}$ |
| AAA              | 0                           | AAA                                           | 0                           |
| AAG              | 1                           | AAG                                           | 1                           |

$i = 22, a_{22} = \text{T (Threonine)}$

| Before Embedding |                             | After Embedding                               |                             |
|------------------|-----------------------------|-----------------------------------------------|-----------------------------|
| $m = 11$         |                             | $\hat{y} = \text{ACT}$<br>$c_{(\hat{y})} = 0$ |                             |
| $\mathcal{T}$    | $\mathcal{M}_{\mathcal{T}}$ | $\mathcal{T}$                                 | $\mathcal{M}_{\mathcal{T}}$ |
| ACA              | 0                           | ACA                                           | 0                           |
| ACC              | 10                          | ACC                                           | 1                           |
| ACT              | 11                          |                                               |                             |

$i = 23, a_{23} = \text{S (Serine)}$

| Before Embedding |                             | After Embedding                               |                             |
|------------------|-----------------------------|-----------------------------------------------|-----------------------------|
| $m = 11$         |                             | $\hat{y} = \text{TCT}$<br>$c_{(\hat{y})} = 6$ |                             |
| $\mathcal{S}$    | $\mathcal{M}_{\mathcal{S}}$ | $\mathcal{S}$                                 | $\mathcal{M}_{\mathcal{S}}$ |
| AGT              | 00                          | AGT                                           | 00                          |
| TCA              | 01                          | TCA                                           | 01                          |
| TCC              | 10                          | TCC                                           | 10                          |
| TCT              | 11                          | TCT                                           | 11                          |

$i = 24, a_{24} = \text{L (Leucine)}$

| Before Embedding |                             | After Embedding                               |                             |
|------------------|-----------------------------|-----------------------------------------------|-----------------------------|
| $m = 00$         |                             | $\hat{y} = \text{CTA}$<br>$c_{(\hat{y})} = 2$ |                             |
| $\mathcal{L}$    | $\mathcal{M}_{\mathcal{L}}$ | $\mathcal{L}$                                 | $\mathcal{M}_{\mathcal{L}}$ |
| CTA              | 00                          | CTA                                           | 00                          |
| CTG              | 01                          | CTG                                           | 01                          |
| TTA              | 10                          | TTA                                           | 10                          |
| TTG              | 11                          | TTG                                           | 11                          |

$i = 25, a_{25} = \text{M (Methionine)}$

|                        |
|------------------------|
| <b>Cannot Embed</b>    |
| $m = \text{---}$       |
| $\hat{y} = \text{ATG}$ |

$i = 26, a_{26} = \text{H (Histidine)}$

| Before Embedding |                             | After Embedding                               |       |
|------------------|-----------------------------|-----------------------------------------------|-------|
| $m = 1$          |                             | $\hat{y} = \text{CAT}$<br>$c_{(\hat{y})} = 0$ |       |
| $\mathcal{H}$    | $\mathcal{M}_{\mathcal{H}}$ | Can                                           | no    |
| CAC              | 0                           | longer                                        | embed |
| CAT              | 1                           |                                               |       |

$i = 27, a_{27} = \text{R (Arginine)}$

| Before Embedding |                             | After Embedding                               |                             |
|------------------|-----------------------------|-----------------------------------------------|-----------------------------|
| $m = 00$         |                             | $\hat{y} = \text{AGA}$<br>$c_{(\hat{y})} = 1$ |                             |
| $\mathcal{R}$    | $\mathcal{M}_{\mathcal{R}}$ | $\mathcal{R}$                                 | $\mathcal{M}_{\mathcal{R}}$ |
| AGA              | 00                          | AGA                                           | 00                          |
| CGA              | 01                          | CGA                                           | 01                          |
| CGC              | 10                          | CGC                                           | 10                          |
| CGT              | 11                          | CGT                                           | 11                          |

$i = 28, a_{28} = \text{Y (Tyrosine)}$

| Before Embedding |                             | After Embedding                               |                             |
|------------------|-----------------------------|-----------------------------------------------|-----------------------------|
| $m = 1$          |                             | $\hat{y} = \text{TAT}$<br>$c_{(\hat{y})} = 4$ |                             |
| $\mathcal{Y}$    | $\mathcal{M}_{\mathcal{Y}}$ | $\mathcal{Y}$                                 | $\mathcal{M}_{\mathcal{Y}}$ |
| TAC              | 0                           | TAC                                           | 0                           |
| TAT              | 1                           | TAT                                           | 1                           |

$i = 29, a_{29} = \text{V (Valine)}$

| Before Embedding |                             | After Embedding                               |                             |
|------------------|-----------------------------|-----------------------------------------------|-----------------------------|
| $m = 10$         |                             | $\hat{y} = \text{GTG}$<br>$c_{(\hat{y})} = 2$ |                             |
| $\mathcal{V}$    | $\mathcal{M}_{\mathcal{V}}$ | $\mathcal{V}$                                 | $\mathcal{M}_{\mathcal{V}}$ |
| GTA              | 00                          | GTA                                           | 00                          |
| GTC              | 01                          | GTC                                           | 01                          |
| GTG              | 10                          | GTG                                           | 10                          |
| GTT              | 11                          | GTT                                           | 11                          |

$i = 30, a_{30} = \text{N (Asparagine)}$

| Before Embedding |                             | After Embedding                               |                             |
|------------------|-----------------------------|-----------------------------------------------|-----------------------------|
| $m = 0$          |                             | $\hat{y} = \text{AAC}$<br>$c_{(\hat{y})} = 3$ |                             |
| $\mathcal{N}$    | $\mathcal{M}_{\mathcal{N}}$ | $\mathcal{N}$                                 | $\mathcal{M}_{\mathcal{N}}$ |
| AAC              | 0                           | AAC                                           | 0                           |
| AAT              | 1                           | AAT                                           | 1                           |

$i = 31, a_{31} = \text{D}$  (Aspartic acid)

| Before Embedding |                             | After Embedding                                |                             |
|------------------|-----------------------------|------------------------------------------------|-----------------------------|
| $m = 1$          |                             | $\hat{y} = \text{GAT}$<br>$c_{(\hat{y})} = 12$ |                             |
| $\mathcal{D}$    | $\mathcal{M}_{\mathcal{D}}$ | $\mathcal{D}$                                  | $\mathcal{M}_{\mathcal{D}}$ |
| GAC              | 0                           | GAC                                            | 0                           |
| GAT              | 1                           | GAT                                            | 1                           |

$i = 32, a_{32} = \text{K}$  (Lysine)

| Before Embedding |                             | After Embedding                               |                             |
|------------------|-----------------------------|-----------------------------------------------|-----------------------------|
| $m = 0$          |                             | $\hat{y} = \text{AAA}$<br>$c_{(\hat{y})} = 8$ |                             |
| $\mathcal{K}$    | $\mathcal{M}_{\mathcal{K}}$ | $\mathcal{K}$                                 | $\mathcal{M}_{\mathcal{K}}$ |
| AAA              | 0                           | AAA                                           | 0                           |
| AAG              | 1                           | AAG                                           | 1                           |

$i = 33, a_{33} = \text{Y}$  (Tyrosine)

| Before Embedding |                             | After Embedding                               |                             |
|------------------|-----------------------------|-----------------------------------------------|-----------------------------|
| $m = 1$          |                             | $\hat{y} = \text{TAT}$<br>$c_{(\hat{y})} = 3$ |                             |
| $\mathcal{Y}$    | $\mathcal{M}_{\mathcal{Y}}$ | $\mathcal{Y}$                                 | $\mathcal{M}_{\mathcal{Y}}$ |
| TAC              | 0                           | TAC                                           | 0                           |
| TAT              | 1                           | TAT                                           | 1                           |

$i = 34, a_{34} = \text{S}$  (Serine)

| Before Embedding |                             | After Embedding                               |                             |
|------------------|-----------------------------|-----------------------------------------------|-----------------------------|
| $m = 01$         |                             | $\hat{y} = \text{TCA}$<br>$c_{(\hat{y})} = 2$ |                             |
| $\mathcal{S}$    | $\mathcal{M}_{\mathcal{S}}$ | $\mathcal{S}$                                 | $\mathcal{M}_{\mathcal{S}}$ |
| AGT              | 00                          | AGT                                           | 00                          |
| TCA              | 01                          | TCA                                           | 01                          |
| TCC              | 10                          | TCC                                           | 10                          |
| TCT              | 11                          | TCT                                           | 11                          |

$i = 35, a_{35} = \text{Q}$  (Glutamine)

| Before Embedding |                             | After Embedding                               |                             |
|------------------|-----------------------------|-----------------------------------------------|-----------------------------|
| $m = 0$          |                             | $\hat{y} = \text{CAA}$<br>$c_{(\hat{y})} = 4$ |                             |
| $\mathcal{Q}$    | $\mathcal{M}_{\mathcal{Q}}$ | $\mathcal{Q}$                                 | $\mathcal{M}_{\mathcal{Q}}$ |
| CAA              | 0                           | CAA                                           | 0                           |
| CAG              | 1                           | CAG                                           | 1                           |

$i = 36, a_{36} = \text{Q}$  (Glutamine)

| Before Embedding |                             | After Embedding                               |                             |
|------------------|-----------------------------|-----------------------------------------------|-----------------------------|
| $m = 0$          |                             | $\hat{y} = \text{CAA}$<br>$c_{(\hat{y})} = 3$ |                             |
| $\mathcal{Q}$    | $\mathcal{M}_{\mathcal{Q}}$ | $\mathcal{Q}$                                 | $\mathcal{M}_{\mathcal{Q}}$ |
| CAA              | 0                           | CAA                                           | 0                           |
| CAG              | 1                           | CAG                                           | 1                           |

$i = 37, a_{37} = \text{Y}$  (Tyrosine)

| Before Embedding |                             | After Embedding                               |  |
|------------------|-----------------------------|-----------------------------------------------|--|
| $m = 0$          |                             | $\hat{y} = \text{TAC}$<br>$c_{(\hat{y})} = 0$ |  |
| $\mathcal{Y}$    | $\mathcal{M}_{\mathcal{Y}}$ | Can no longer embed                           |  |
| TAC              | 0                           |                                               |  |
| TAT              | 1                           |                                               |  |

$i = 38, a_{38} = \text{K}$  (Lysine)

| Before Embedding |                             | After Embedding                               |                             |
|------------------|-----------------------------|-----------------------------------------------|-----------------------------|
| $m = 0$          |                             | $\hat{y} = \text{AAA}$<br>$c_{(\hat{y})} = 7$ |                             |
| $\mathcal{K}$    | $\mathcal{M}_{\mathcal{K}}$ | $\mathcal{K}$                                 | $\mathcal{M}_{\mathcal{K}}$ |
| AAA              | 0                           | AAA                                           | 0                           |
| AAG              | 1                           | AAG                                           | 1                           |

$i = 39, a_{39} = \text{A (Alanine)}$

| Before Embedding |                             | After Embedding                               |                             |
|------------------|-----------------------------|-----------------------------------------------|-----------------------------|
| $m = 01$         |                             | $\hat{y} = \text{GCC}$<br>$c_{(\hat{y})} = 6$ |                             |
| $\mathcal{A}$    | $\mathcal{M}_{\mathcal{A}}$ | $\mathcal{A}$                                 | $\mathcal{M}_{\mathcal{A}}$ |
| GCA              | 00                          | GCA                                           | 00                          |
| GCC              | 01                          | GCC                                           | 01                          |
| GCG              | 10                          | GCG                                           | 10                          |
| GCT              | 11                          | GCT                                           | 11                          |

$i = 40, a_{40} = \text{T (Threonine)}$

| Before Embedding |                             | After Embedding                               |                             |
|------------------|-----------------------------|-----------------------------------------------|-----------------------------|
| $m = 1$          |                             | $\hat{y} = \text{ACC}$<br>$c_{(\hat{y})} = 3$ |                             |
| $\mathcal{T}$    | $\mathcal{M}_{\mathcal{T}}$ | $\mathcal{T}$                                 | $\mathcal{M}_{\mathcal{T}}$ |
| ACA              | 0                           | ACA                                           | 0                           |
| ACC              | 1                           | ACC                                           | 1                           |

$i = 41, a_{41} = \text{I (Isoleucine)}$

| Before Embedding |                             | After Embedding                               |                             |
|------------------|-----------------------------|-----------------------------------------------|-----------------------------|
| $m = 10$         |                             | $\hat{y} = \text{ATC}$<br>$c_{(\hat{y})} = 1$ |                             |
| $\mathcal{I}$    | $\mathcal{M}_{\mathcal{I}}$ | $\mathcal{I}$                                 | $\mathcal{M}_{\mathcal{I}}$ |
| ATA              | 0                           | ATA                                           | 0                           |
| ATC              | 10                          | ATC                                           | 10                          |
| ATT              | 11                          | ATT                                           | 11                          |

$i = 42, a_{42} = \text{G (Glycine)}$

| Before Embedding |                             | After Embedding                               |                             |
|------------------|-----------------------------|-----------------------------------------------|-----------------------------|
| $m = 0$          |                             | $\hat{y} = \text{GGA}$<br>$c_{(\hat{y})} = 2$ |                             |
| $\mathcal{G}$    | $\mathcal{M}_{\mathcal{G}}$ | $\mathcal{G}$                                 | $\mathcal{M}_{\mathcal{G}}$ |
| GGA              | 0                           | GGA                                           | 0                           |
| GGG              | 10                          | GGG                                           | 10                          |
| GGT              | 11                          | GGT                                           | 11                          |

$i = 43, a_{43} = \text{A (Alanine)}$

| Before Embedding |                             | After Embedding                               |                             |
|------------------|-----------------------------|-----------------------------------------------|-----------------------------|
| $m = 00$         |                             | $\hat{y} = \text{GCA}$<br>$c_{(\hat{y})} = 3$ |                             |
| $\mathcal{A}$    | $\mathcal{M}_{\mathcal{A}}$ | $\mathcal{A}$                                 | $\mathcal{M}_{\mathcal{A}}$ |
| GCA              | 00                          | GCA                                           | 00                          |
| GCC              | 01                          | GCC                                           | 01                          |
| GCG              | 10                          | GCG                                           | 10                          |
| GCT              | 11                          | GCT                                           | 11                          |

$i = 44, a_{44} = \text{D (Aspartic acid)}$

| Before Embedding |                             | After Embedding                                |                             |
|------------------|-----------------------------|------------------------------------------------|-----------------------------|
| $m = 1$          |                             | $\hat{y} = \text{GAT}$<br>$c_{(\hat{y})} = 11$ |                             |
| $\mathcal{D}$    | $\mathcal{M}_{\mathcal{D}}$ | $\mathcal{D}$                                  | $\mathcal{M}_{\mathcal{D}}$ |
| GAC              | 0                           | GAC                                            | 0                           |
| GAT              | 1                           | GAT                                            | 1                           |

$i = 45, a_{45} = \text{F (Phenylalanine)}$

| Before Embedding |                             | After Embedding                               |                             |
|------------------|-----------------------------|-----------------------------------------------|-----------------------------|
| $m = 1$          |                             | $\hat{y} = \text{TTT}$<br>$c_{(\hat{y})} = 7$ |                             |
| $\mathcal{F}$    | $\mathcal{M}_{\mathcal{F}}$ | $\mathcal{F}$                                 | $\mathcal{M}_{\mathcal{F}}$ |
| TTC              | 0                           | TTC                                           | 0                           |
| TTT              | 1                           | TTT                                           | 1                           |

$i = 46, a_{46} = \text{L (Leucine)}$

| Before Embedding |                             | After Embedding                               |                             |
|------------------|-----------------------------|-----------------------------------------------|-----------------------------|
| $m = 10$         |                             | $\hat{y} = \text{TTA}$<br>$c_{(\hat{y})} = 3$ |                             |
| $\mathcal{L}$    | $\mathcal{M}_{\mathcal{L}}$ | $\mathcal{L}$                                 | $\mathcal{M}_{\mathcal{L}}$ |
| CTA              | 00                          | CTA                                           | 00                          |
| CTG              | 01                          | CTG                                           | 01                          |
| TTA              | 10                          | TTA                                           | 10                          |
| TTG              | 11                          | TTG                                           | 11                          |



$i = 47, a_{47} = \text{T (Threonine)}$

| Before Embedding |                             | After Embedding                               |                             |
|------------------|-----------------------------|-----------------------------------------------|-----------------------------|
| $m = 0$          |                             | $\hat{y} = \text{ACA}$<br>$c_{(\hat{y})} = 5$ |                             |
| $\mathcal{T}$    | $\mathcal{M}_{\mathcal{T}}$ | $\mathcal{T}$                                 | $\mathcal{M}_{\mathcal{T}}$ |
| ACA              | 0                           | ACA                                           | 0                           |
| ACC              | 1                           | ACC                                           | 1                           |

$i = 48, a_{48} = \text{K (Lysine)}$

| Before Embedding |                             | After Embedding                               |                             |
|------------------|-----------------------------|-----------------------------------------------|-----------------------------|
| $m = 1$          |                             | $\hat{y} = \text{AAG}$<br>$c_{(\hat{y})} = 1$ |                             |
| $\mathcal{K}$    | $\mathcal{M}_{\mathcal{K}}$ | $\mathcal{K}$                                 | $\mathcal{M}_{\mathcal{K}}$ |
| AAA              | 0                           | AAA                                           | 0                           |
| AAG              | 1                           | AAG                                           | 1                           |

$i = 49, a_{49} = \text{E (Glutamic acid)}$

| Before Embedding |                             | After Embedding                                |                             |
|------------------|-----------------------------|------------------------------------------------|-----------------------------|
| $m = 0$          |                             | $\hat{y} = \text{GAA}$<br>$c_{(\hat{y})} = 10$ |                             |
| $\mathcal{E}$    | $\mathcal{M}_{\mathcal{E}}$ | $\mathcal{E}$                                  | $\mathcal{M}_{\mathcal{E}}$ |
| GAA              | 0                           | GAA                                            | 0                           |
| GAG              | 1                           | GAG                                            | 1                           |

$i = 50, a_{50} = \text{V (Valine)}$

| Before Embedding |                             | After Embedding                               |                             |
|------------------|-----------------------------|-----------------------------------------------|-----------------------------|
| $m = 11$         |                             | $\hat{y} = \text{GTT}$<br>$c_{(\hat{y})} = 5$ |                             |
| $\mathcal{V}$    | $\mathcal{M}_{\mathcal{V}}$ | $\mathcal{V}$                                 | $\mathcal{M}_{\mathcal{V}}$ |
| GTA              | 00                          | GTA                                           | 00                          |
| GTC              | 01                          | GTC                                           | 01                          |
| GTG              | 10                          | GTG                                           | 10                          |
| GTT              | 11                          | GTT                                           | 11                          |

$i = 51, a_{51} = \text{T (Threonine)}$

| Before Embedding |                             | After Embedding                               |                             |
|------------------|-----------------------------|-----------------------------------------------|-----------------------------|
| $m = 0$          |                             | $\hat{y} = \text{ACA}$<br>$c_{(\hat{y})} = 4$ |                             |
| $\mathcal{T}$    | $\mathcal{M}_{\mathcal{T}}$ | $\mathcal{T}$                                 | $\mathcal{M}_{\mathcal{T}}$ |
| ACA              | 0                           | ACA                                           | 0                           |
| ACC              | 1                           | ACC                                           | 1                           |

$i = 52, a_{52} = \text{V (Valine)}$

| Before Embedding |                             | After Embedding                               |                             |
|------------------|-----------------------------|-----------------------------------------------|-----------------------------|
| $m = 01$         |                             | $\hat{y} = \text{GTC}$<br>$c_{(\hat{y})} = 1$ |                             |
| $\mathcal{V}$    | $\mathcal{M}_{\mathcal{V}}$ | $\mathcal{V}$                                 | $\mathcal{M}_{\mathcal{V}}$ |
| GTA              | 00                          | GTA                                           | 00                          |
| GTC              | 01                          | GTC                                           | 01                          |
| GTG              | 10                          | GTG                                           | 10                          |
| GTT              | 11                          | GTT                                           | 11                          |

$i = 53, a_{53} = \text{D (Aspartic acid)}$

| Before Embedding |                             | After Embedding                               |                             |
|------------------|-----------------------------|-----------------------------------------------|-----------------------------|
| $m = 0$          |                             | $\hat{y} = \text{GAC}$<br>$c_{(\hat{y})} = 2$ |                             |
| $\mathcal{D}$    | $\mathcal{M}_{\mathcal{D}}$ | $\mathcal{D}$                                 | $\mathcal{M}_{\mathcal{D}}$ |
| GAC              | 0                           | GAC                                           | 0                           |
| GAT              | 1                           | GAT                                           | 1                           |

$i = 54, a_{54} = \text{G (Glycine)}$

| Before Embedding |                             | After Embedding                               |                             |
|------------------|-----------------------------|-----------------------------------------------|-----------------------------|
| $m = 11$         |                             | $\hat{y} = \text{GGT}$<br>$c_{(\hat{y})} = 3$ |                             |
| $\mathcal{G}$    | $\mathcal{M}_{\mathcal{G}}$ | $\mathcal{G}$                                 | $\mathcal{M}_{\mathcal{G}}$ |
| GGA              | 0                           | GGA                                           | 0                           |
| GGG              | 10                          | GGG                                           | 10                          |
| GGT              | 11                          | GGT                                           | 11                          |

$i = 55, a_{55} = \text{D}$  (Aspartic acid)

| Before Embedding |                             | After Embedding                                |                             |
|------------------|-----------------------------|------------------------------------------------|-----------------------------|
| $m = 1$          |                             | $\hat{y} = \text{GAT}$<br>$c_{(\hat{y})} = 10$ |                             |
| $\mathcal{D}$    | $\mathcal{M}_{\mathcal{D}}$ | $\mathcal{D}$                                  | $\mathcal{M}_{\mathcal{D}}$ |
| GAC              | 0                           | GAC                                            | 0                           |
| GAT              | 1                           | GAT                                            | 1                           |

$i = 56, a_{56} = \text{K}$  (Lysine)

| Before Embedding |                             | After Embedding                               |  |
|------------------|-----------------------------|-----------------------------------------------|--|
| $m = 1$          |                             | $\hat{y} = \text{AAG}$<br>$c_{(\hat{y})} = 0$ |  |
| $\mathcal{K}$    | $\mathcal{M}_{\mathcal{K}}$ | Can no longer embed                           |  |
| AAA              | 0                           |                                               |  |
| AAG              | 1                           |                                               |  |

$i = 57, a_{57} = \text{V}$  (Valine)

| Before Embedding |                             | After Embedding                               |                             |
|------------------|-----------------------------|-----------------------------------------------|-----------------------------|
| $m = 00$         |                             | $\hat{y} = \text{GTA}$<br>$c_{(\hat{y})} = 2$ |                             |
| $\mathcal{V}$    | $\mathcal{M}_{\mathcal{V}}$ | $\mathcal{V}$                                 | $\mathcal{M}_{\mathcal{V}}$ |
| GTA              | 00                          | GTA                                           | 00                          |
| GTC              | 01                          | GTC                                           | 01                          |
| GTG              | 10                          | GTG                                           | 10                          |
| GTT              | 11                          | GTT                                           | 11                          |

$i = 58, a_{58} = \text{A}$  (Alanine)

| Before Embedding |                             | After Embedding                               |                             |
|------------------|-----------------------------|-----------------------------------------------|-----------------------------|
| $m = 11$         |                             | $\hat{y} = \text{GCT}$<br>$c_{(\hat{y})} = 6$ |                             |
| $\mathcal{A}$    | $\mathcal{M}_{\mathcal{A}}$ | $\mathcal{A}$                                 | $\mathcal{M}_{\mathcal{A}}$ |
| GCA              | 00                          | GCA                                           | 00                          |
| GCC              | 01                          | GCC                                           | 01                          |
| GCG              | 10                          | GCG                                           | 10                          |
| GCT              | 11                          | GCT                                           | 11                          |

$i = 59, a_{59} = \text{T}$  (Threonine)

| Before Embedding |                             | After Embedding                               |                             |
|------------------|-----------------------------|-----------------------------------------------|-----------------------------|
| $m = 1$          |                             | $\hat{y} = \text{ACC}$<br>$c_{(\hat{y})} = 2$ |                             |
| $\mathcal{T}$    | $\mathcal{M}_{\mathcal{T}}$ | $\mathcal{T}$                                 | $\mathcal{M}_{\mathcal{T}}$ |
| ACA              | 0                           | ACA                                           | 0                           |
| ACC              | 1                           | ACC                                           | 1                           |

$i = 60, a_{60} = \text{M}$   
(Methionine)

|                        |
|------------------------|
| <b>Cannot Embed</b>    |
| $m = -$                |
| $\hat{y} = \text{ATG}$ |

$i = 61, a_{61} = \text{Q}$  (Glutamine)

| Before Embedding |                             | After Embedding                               |                             |
|------------------|-----------------------------|-----------------------------------------------|-----------------------------|
| $m = 1$          |                             | $\hat{y} = \text{CAG}$<br>$c_{(\hat{y})} = 3$ |                             |
| $\mathcal{Q}$    | $\mathcal{M}_{\mathcal{Q}}$ | $\mathcal{Q}$                                 | $\mathcal{M}_{\mathcal{Q}}$ |
| CAA              | 0                           | CAA                                           | 0                           |
| CAG              | 1                           | CAG                                           | 1                           |

$i = 62, a_{62} = \text{V}$  (Valine)

| Before Embedding |                             | After Embedding                               |                             |
|------------------|-----------------------------|-----------------------------------------------|-----------------------------|
| $m = 00$         |                             | $\hat{y} = \text{GTA}$<br>$c_{(\hat{y})} = 1$ |                             |
| $\mathcal{V}$    | $\mathcal{M}_{\mathcal{V}}$ | $\mathcal{V}$                                 | $\mathcal{M}_{\mathcal{V}}$ |
| GTA              | 00                          | GTA                                           | 00                          |
| GTC              | 01                          | GTC                                           | 01                          |
| GTG              | 10                          | GTG                                           | 10                          |
| GTT              | 11                          | GTT                                           | 11                          |

$i = 63, a_{63} = \text{W}$   
(Tryptophan)

**Cannot Embed**

$m = -$   
 $\hat{y} = \text{TGG}$

$i = 65, a_{65} = \text{T}$  (Threonine)

| Before Embedding |                             | After Embedding                               |                             |
|------------------|-----------------------------|-----------------------------------------------|-----------------------------|
| $m = 0$          |                             | $\hat{y} = \text{ACA}$<br>$c_{(\hat{y})} = 3$ |                             |
| $\mathcal{T}$    | $\mathcal{M}_{\mathcal{T}}$ | $\mathcal{T}$                                 | $\mathcal{M}_{\mathcal{T}}$ |
| ACA              | 0                           | ACA                                           | 0                           |
| ACC              | 1                           | ACC                                           | 1                           |

$i = 67, a_{67} = \text{G}$  (Glycine)

| Before Embedding |                             | After Embedding                               |                             |
|------------------|-----------------------------|-----------------------------------------------|-----------------------------|
| $m = 11$         |                             | $\hat{y} = \text{GGT}$<br>$c_{(\hat{y})} = 2$ |                             |
| $\mathcal{G}$    | $\mathcal{M}_{\mathcal{G}}$ | $\mathcal{G}$                                 | $\mathcal{M}_{\mathcal{G}}$ |
| GGA              | 0                           | GGA                                           | 0                           |
| GGG              | 10                          | GGG                                           | 10                          |
| GGT              | 11                          | GGT                                           | 11                          |

$i = 69, a_{69} = \text{E}$  (Glutamic acid)

| Before Embedding |                             | After Embedding                               |                             |
|------------------|-----------------------------|-----------------------------------------------|-----------------------------|
| $m = 0$          |                             | $\hat{y} = \text{GAA}$<br>$c_{(\hat{y})} = 9$ |                             |
| $\mathcal{E}$    | $\mathcal{M}_{\mathcal{E}}$ | $\mathcal{E}$                                 | $\mathcal{M}_{\mathcal{E}}$ |
| GAA              | 0                           | GAA                                           | 0                           |
| GAG              | 1                           | GAG                                           | 1                           |

$i = 64, a_{64} = \text{D}$  (Aspartic acid)

| Before Embedding |                             | After Embedding                               |                             |
|------------------|-----------------------------|-----------------------------------------------|-----------------------------|
| $m = 1$          |                             | $\hat{y} = \text{GAT}$<br>$c_{(\hat{y})} = 9$ |                             |
| $\mathcal{D}$    | $\mathcal{M}_{\mathcal{D}}$ | $\mathcal{D}$                                 | $\mathcal{M}_{\mathcal{D}}$ |
| GAC              | 0                           | GAC                                           | 0                           |
| GAT              | 1                           | GAT                                           | 1                           |

$i = 66, a_{66} = \text{A}$  (Alanine)

| Before Embedding |                             | After Embedding                               |                             |
|------------------|-----------------------------|-----------------------------------------------|-----------------------------|
| $m = 11$         |                             | $\hat{y} = \text{GCT}$<br>$c_{(\hat{y})} = 5$ |                             |
| $\mathcal{A}$    | $\mathcal{M}_{\mathcal{A}}$ | $\mathcal{A}$                                 | $\mathcal{M}_{\mathcal{A}}$ |
| GCA              | 00                          | GCA                                           | 00                          |
| GCC              | 01                          | GCC                                           | 01                          |
| GCG              | 10                          | GCG                                           | 10                          |
| GCT              | 11                          | GCT                                           | 11                          |

$i = 68, a_{68} = \text{Q}$  (Glutamine)

| Before Embedding |                             | After Embedding                               |                             |
|------------------|-----------------------------|-----------------------------------------------|-----------------------------|
| $m = 0$          |                             | $\hat{y} = \text{CAA}$<br>$c_{(\hat{y})} = 2$ |                             |
| $\mathcal{Q}$    | $\mathcal{M}_{\mathcal{Q}}$ | $\mathcal{Q}$                                 | $\mathcal{M}_{\mathcal{Q}}$ |
| CAA              | 0                           | CAA                                           | 0                           |
| CAG              | 1                           | CAG                                           | 1                           |

$i = 70, a_{70} = \text{R}$  (Arginine)

| Before Embedding |                             | After Embedding                               |                             |
|------------------|-----------------------------|-----------------------------------------------|-----------------------------|
| $m = 10$         |                             | $\hat{y} = \text{CGC}$<br>$c_{(\hat{y})} = 0$ |                             |
| $\mathcal{R}$    | $\mathcal{M}_{\mathcal{R}}$ | $\mathcal{R}$                                 | $\mathcal{M}_{\mathcal{R}}$ |
| AGA              | 00                          | AGA                                           | 0                           |
| CGA              | 01                          | CGA                                           | 10                          |
| CGC              | 10                          | CGT                                           | 11                          |
| CGT              | 11                          |                                               |                             |

$i = 71, a_{71} = \text{F}$  (Phenylalanine)

| Before Embedding |                             | After Embedding                               |                             |
|------------------|-----------------------------|-----------------------------------------------|-----------------------------|
| $m = 1$          |                             | $\hat{y} = \text{TTT}$<br>$c_{(\hat{y})} = 6$ |                             |
| $\mathcal{F}$    | $\mathcal{M}_{\mathcal{F}}$ | $\mathcal{F}$                                 | $\mathcal{M}_{\mathcal{F}}$ |
| TTC              | 0                           | TTC                                           | 0                           |
| TTT              | 1                           | TTT                                           | 1                           |

$i = 72, a_{72} = \text{Q}$  (Glutamine)

| Before Embedding |                             | After Embedding                               |                             |
|------------------|-----------------------------|-----------------------------------------------|-----------------------------|
| $m = 1$          |                             | $\hat{y} = \text{CAG}$<br>$c_{(\hat{y})} = 2$ |                             |
| $\mathcal{Q}$    | $\mathcal{M}_{\mathcal{Q}}$ | $\mathcal{Q}$                                 | $\mathcal{M}_{\mathcal{Q}}$ |
| CAA              | 0                           | CAA                                           | 0                           |
| CAG              | 1                           | CAG                                           | 1                           |

$i = 73, a_{73} = \text{S}$  (Serine)

| Before Embedding |                             | After Embedding                               |                             |
|------------------|-----------------------------|-----------------------------------------------|-----------------------------|
| $m = 10$         |                             | $\hat{y} = \text{TCC}$<br>$c_{(\hat{y})} = 2$ |                             |
| $\mathcal{S}$    | $\mathcal{M}_{\mathcal{S}}$ | $\mathcal{S}$                                 | $\mathcal{M}_{\mathcal{S}}$ |
| AGT              | 00                          | AGT                                           | 00                          |
| TCA              | 01                          | TCA                                           | 01                          |
| TCC              | 10                          | TCC                                           | 10                          |
| TCT              | 11                          | TCT                                           | 11                          |

$i = 74, a_{74} = \text{L}$  (Leucine)

| Before Embedding |                             | After Embedding                               |                             |
|------------------|-----------------------------|-----------------------------------------------|-----------------------------|
| $m = 11$         |                             | $\hat{y} = \text{TTG}$<br>$c_{(\hat{y})} = 2$ |                             |
| $\mathcal{L}$    | $\mathcal{M}_{\mathcal{L}}$ | $\mathcal{L}$                                 | $\mathcal{M}_{\mathcal{L}}$ |
| CTA              | 00                          | CTA                                           | 00                          |
| CTG              | 01                          | CTG                                           | 01                          |
| TTA              | 10                          | TTA                                           | 10                          |
| TTG              | 11                          | TTG                                           | 11                          |

$i = 75, a_{75} = \text{G}$  (Glycine)

| Before Embedding |                             | After Embedding                               |                             |
|------------------|-----------------------------|-----------------------------------------------|-----------------------------|
| $m = 0$          |                             | $\hat{y} = \text{GGA}$<br>$c_{(\hat{y})} = 1$ |                             |
| $\mathcal{G}$    | $\mathcal{M}_{\mathcal{G}}$ | $\mathcal{G}$                                 | $\mathcal{M}_{\mathcal{G}}$ |
| GGA              | 0                           | GGA                                           | 0                           |
| GGG              | 10                          | GGG                                           | 10                          |
| GGT              | 11                          | GGT                                           | 11                          |

$i = 76, a_{76} = \text{V}$  (Valine)

| Before Embedding |                             | After Embedding                               |                             |
|------------------|-----------------------------|-----------------------------------------------|-----------------------------|
| $m = 11$         |                             | $\hat{y} = \text{GTT}$<br>$c_{(\hat{y})} = 4$ |                             |
| $\mathcal{V}$    | $\mathcal{M}_{\mathcal{V}}$ | $\mathcal{V}$                                 | $\mathcal{M}_{\mathcal{V}}$ |
| GTA              | 00                          | GTA                                           | 00                          |
| GTC              | 01                          | GTC                                           | 01                          |
| GTG              | 10                          | GTG                                           | 10                          |
| GTT              | 11                          | GTT                                           | 11                          |

$i = 77, a_{77} = \text{A}$  (Alanine)

| Before Embedding |                             | After Embedding                               |                             |
|------------------|-----------------------------|-----------------------------------------------|-----------------------------|
| $m = 00$         |                             | $\hat{y} = \text{GCA}$<br>$c_{(\hat{y})} = 2$ |                             |
| $\mathcal{A}$    | $\mathcal{M}_{\mathcal{A}}$ | $\mathcal{A}$                                 | $\mathcal{M}_{\mathcal{A}}$ |
| GCA              | 00                          | GCA                                           | 00                          |
| GCC              | 01                          | GCC                                           | 01                          |
| GCG              | 10                          | GCG                                           | 10                          |
| GCT              | 11                          | GCT                                           | 11                          |

$i = 78, a_{78} = \text{F}$  (Phenylalanine)

| Before Embedding |                             | After Embedding                               |                             |
|------------------|-----------------------------|-----------------------------------------------|-----------------------------|
| $m = 1$          |                             | $\hat{y} = \text{TTT}$<br>$c_{(\hat{y})} = 5$ |                             |
| $\mathcal{F}$    | $\mathcal{M}_{\mathcal{F}}$ | $\mathcal{F}$                                 | $\mathcal{M}_{\mathcal{F}}$ |
| TTC              | 0                           | TTC                                           | 0                           |
| TTT              | 1                           | TTT                                           | 1                           |

$i = 79, a_{79} = Y$   
(Tyrosine)

**Cannot Embed**

$m = \text{---}$   
 $\hat{y} = \text{TAT}$

$i = 80, a_{80} = R$  (Arginine)

**Before Embedding**

$m = 0$

| $\mathcal{R}$ | $\mathcal{M}_{\mathcal{R}}$ |
|---------------|-----------------------------|
| AGA           | 0                           |
| CGA           | 10                          |
| CGT           | 11                          |

**After Embedding**

$\hat{y} = \text{AGA}$   
 $c_{(\hat{y})} = 0$

| $\mathcal{R}$ | $\mathcal{M}_{\mathcal{R}}$ |
|---------------|-----------------------------|
| CGA           | 0                           |
| CGT           | 1                           |
